# Supplementary material for: A viral toolbox for conditional and transneuronal gene expression in zebrafish
Source: eLife. 2022 Jul 22;11:e77153. doi: 10.7554/eLife.77153 (PMC9307271; doi:10.7554/eLife.77153)
Supplement: Figure 2—source data 1. — Please note that not all HSV1s have been tested by injections (see comments column). Requests for HSV1 and the destination vector shown in Figure 2A should be addressed to R.L.N. [file elife-77153-fig2-data1.xlsx]

## Sheet: Sheet1
Promoter	Transgene	Transgene description	Comments
LTCMV	GFP	Green fluorescent protein	Figure1-fugre supplement 4A-D
	DsRed	Red fluorescent protein	Figure2, Figure1B-C, Figure1-figure supplement 1A, 2B, 3
	mCherry	Red fluorescent protein	not tested in this study
	tdTomato	Red fluorescent protein	not tested in this study
	tagBFP-CAAX	Blue fluorescent protein, membrane targeted	not tested in this study
	Venus-CAAX	Yellow fluorescent protein (YFP), membrane targeted	not tested in this study
	TVA-mCherry	TVA-mCherry fusion	not tested in this study
	GCamp6s	Green flourescent calcium indicator	not tested in this study
	Gal4	Gal4	Figure2E-F, Figure2-fugre supplement 3
	ChR2-YFP	Channelrhodopsin-2-YFP fusion	not tested in this study
	ChR2-mCherry	ChR2-mCherry fusion	not tested in this study
	eNpHR3.0	Halorhodopsin	not tested in this study
	H2B_GCamp6s	Green flourescent calcium indicator, targeted to nucleus	not tested in this study
	jGCamp7s	Green flourescent calcium indicator	not tested in this study
	jGCamp7b	Green flourescent calcium indicator	Figure1-fugre supplement 2D
UAS	GFP	Green fluorescent protein	Fig. 2b, Fig. S2e, Fig. S4
	mCherry	Red fluorescent protein	not tested in this study
	tagBFP-CAAX	Blue fluorescent protein, membrane targeted	not tested in this study
	Venus-CAAX	Yellow fluorescent protein (YFP), membrane targeted	Figure 2D
	GCamp6f	Green flourescent calcium indicator	Figure2-fugre supplement 3
	Chrimson-tdTomato	Chrimson-tdTomato fusion	Figure2-fugre supplement 3
	Jaws-mRuby	Jaws-mRuby fusion	not tested in this study
	TVA-mCherry	TVA-mCherry fusion	Figure2B, Figure2-fugre supplement 1, 2, Figure4-fugre supplement 2, Figure4
	zoSADG	glycoprotein for rabies tracing	Figure4-fugre supplement 2, Figure4, Figure5,
	TeNT-GFP	tetanus toxin light chain fused with GFP	Figure2-fugre supplement 4
	DT(Diphtheria toxin)	diphteria toxin	not tested in this study
