# Supplementary material for: A viral toolbox for conditional and transneuronal gene expression in zebrafish
Source: eLife. 2022 Jul 22;11:e77153. doi: 10.7554/eLife.77153 (PMC9307271; doi:10.7554/eLife.77153)
Supplement: Figure 3—source data 1. — Genes associated with GO terms cellular response to stress (GO:0033554) and cell death (GO: 0008219) are listed at the top (colored rows). [file elife-77153-fig3-data1.xlsx]

## Sheet: Sheet1
primaryID	secondaryID	logFC	logCPM	PValue	FDR	marker genes	up/down
blk	2699	-8.55359	3.67669	4.87566e-06	0.000114439	stress/death marker	down
pycard	916	-7.91768	6.02809	6.07016e-14	2.94171e-11	stress/death marker	down
crip1	1171	-5.13301	6.20801	4.63998e-12	8.88988e-10	stress/death marker	down
cd74b	1071	-4.80341	10.0098	8.14981e-09	4.61459e-07	stress/death marker	down
cd74a	1273	-4.36402	10.4726	1.58897e-08	8.08071e-07	stress/death marker	down
socs3a	1935	-4.0175	6.36996	1.92082e-08	9.53295e-07	stress/death marker	down
anxa1a	1317	-3.70614	3.82908	0.00220066	0.0198252	stress/death marker	down
nck1a	1736	-3.58713	4.0589	7.7287e-07	2.30867e-05	stress/death marker	down
apoeb	1718	-7.39177	9.45742	1.2788e-12	3.19253e-10	stress marker	down
caspa	1542	-6.56129	3.60458	8.50218e-11	9.52996e-09	stress marker	down
tnfaip8l2a	2999	-6.52287	4.57952	3.59238e-13	1.18462e-10	stress marker	down
caspb	1819	-6.49	6.38532	6.88634e-12	1.28939e-09	stress marker	down
tnfsf10l	6065	-6.05507	3.20528	7.12268e-07	2.17334e-05	stress marker	down
kita	3558	-5.92947	3.36102	1.79736e-06	4.76893e-05	stress marker	down
gsdmeb	2380	-4.88661	4.55598	8.10546e-08	3.24159e-06	stress marker	down
bnip4	1401	-4.24925	3.11159	1.50942e-06	4.07718e-05	stress marker	down
casp22	1164	-4.22537	4.43415	1.49936e-09	1.10785e-07	stress marker	down
lgals3b	1678	-4.1048	4.69818	2.25924e-07	7.85346e-06	stress marker	down
gsdmea	2051	-3.81746	3.24064	5.70901e-05	0.000945401	stress marker	down
pak2a	2569	-3.66208	4.84955	2.89085e-07	9.72093e-06	stress marker	down
si:ch211-66k16.27	1149	-3.64003	4.54818	5.38429e-07	1.69631e-05	stress marker	down
tradd	1302	-3.54664	3.2787	1.82234e-06	4.81968e-05	stress marker	down
ngfrb	1974	-3.53524	4.57901	2.22563e-08	1.09795e-06	stress marker	down
dnase2b	1363	-3.31229	3.08268	4.84824e-05	0.000830401	stress marker	down
prkcdb	6370	-3.16048	4.45449	2.88447e-05	0.000530439	stress marker	down
bida	917	-3.01785	5.5786	5.344e-05	0.000896671	stress marker	down
mcamb	3597	-8.41473	5.82093	1.79621e-16	4.22801e-13	cell death marker	down
cdk1	1367	-6.56203	4.32548	1.04506e-10	1.11433e-08	cell death marker	down
csrp1a	2786	-3.44261	4.81225	3.59218e-05	0.000641444	cell death marker	down
neil3	2301	-3.25707	3.68571	2.00127e-05	0.000387485	cell death marker	down
rmi2	2164	-3.13634	6.81928	8.49439e-13	2.29446e-10	cell death marker	down
ccnd1	2826	-3.08015	4.21904	2.9475e-07	9.89125e-06	cell death marker	down
tnfrsf9a	1514	4.57984	5.16464	9.65601e-06	0.000207164	stress	up
nfe2l1a	3303	3.26224	4.40103	0.000446745	0.00544454	celldeath	up
sesn2	2194	3.47336	5.37929	6.44885e-08	2.64982e-06	celldeath	up
nfe2l2b	3002	4.60228	3.4925	6.01332e-08	2.48949e-06	celldeath	up
ppp1r15b	2374	5.54702	4.98766	6.44258e-10	5.44034e-08	celldeath	up
calhm6	1503	-10.39	4.35185	8.97841e-18	4.93124e-14
si:ch211-171h4.5	1511	-10.271	3.26151	2.1365e-09	1.45468e-07
si:dkey-148a17.6	1358	-10.1629	3.95968	2.06414e-12	4.59607e-10
sla1a	1350	-10.0414	4.30224	4.15292e-17	1.36855e-13
si:dkeyp-87d8.8	1795	-9.91392	3.61626	1.06893e-09	8.42713e-08
csf1ra	3459	-9.60321	6.55803	1.02797e-19	1.69379e-15
si:dkey-256h2.1	1744	-9.564	3.10568	5.5852e-11	6.77101e-09
pdk2b	2368	-9.51768	3.09074	1.42444e-09	1.05723e-07
cmklr1	1157	-9.40585	4.53427	3.5097e-14	2.04671e-11
sb:cb81	2447	-9.37527	4.23237	3.79474e-17	1.36855e-13
stoml3b	1193	-9.2643	3.28901	1.14679e-14	8.83456e-12
zgc:101715	1451	-9.11748	3.3427	4.37836e-14	2.21925e-11
c1qc	930	-9.08859	8.20028	6.64037e-16	1.21518e-12
zgc:173915	1007	-9.08576	4.63454	1.53033e-12	3.65437e-10
il10ra	3764	-9.0722	5.71572	2.94828e-15	3.10482e-12
si:dkey-32n7.4	5121	-9.03052	4.85658	2.854e-16	5.87817e-13
si:dkey-5n18.1	810	-9.02918	6.88587	1.17959e-14	8.83456e-12
kif23	3960	-8.97105	3.34179	1.09526e-07	4.16779e-06
si:ch211-241f5.3	646	-8.97032	3.0444	5.20086e-09	3.10488e-07
bin1b	2143	-8.9085	4.0985	3.76605e-14	2.06677e-11
tgm2l	2543	-8.89724	3.15914	5.49202e-12	1.04014e-09
rhoga	809	-8.74729	3.09306	1.98695e-14	1.42344e-11
cfbl	2575	-8.56078	3.93479	1.97084e-07	7.02772e-06
entpd1	2659	-8.48709	6.35114	7.65849e-18	4.93124e-14
csf1rb	2894	-8.37452	3.27659	1.35172e-12	3.32422e-10
p2ry12	1371	-8.33272	3.36091	2.2509e-13	8.24178e-11
c1qa	1133	-8.26953	7.13302	6.72659e-13	1.95253e-10
lpcat2	2803	-8.20867	3.29875	5.99418e-09	3.51481e-07
si:ch211-1o7.3	2166	-8.19908	4.43923	1.14909e-13	4.7334e-11
tlr8b	2406	-8.19408	4.04376	6.75451e-13	1.95253e-10
ccr12a	1113	-8.17951	5.74008	2.45203e-15	3.10482e-12
zgc:172090	3071	-8.09484	3.76806	3.11516e-12	6.49729e-10
si:ch1073-67j19.1	913	-8.0804	3.63831	5.36642e-05	0.000898603
si:dkey-18p12.4	1738	-8.07066	3.81652	5.67495e-09	3.35147e-07
plcg2	4465	-8.00751	4.94768	1.47453e-11	2.40552e-09
zgc:112492	1977	-8.00113	7.268	5.4341e-15	4.7125e-12
sema4aa	1971	-7.99144	3.62218	5.86026e-11	6.99707e-09
si:ch211-286b5.9	1720	-7.92341	3.6257	1.77251e-11	2.67942e-09
c1qb	940	-7.91322	7.50076	1.38111e-13	5.41823e-11
lgals3bpa	1977	-7.86465	6.81737	3.60227e-14	2.04671e-11
itga4	2270	-7.83543	4.11808	1.13022e-13	4.7334e-11
si:ch211-106e7.2	5290	-7.78794	3.71111	5.41063e-08	2.32164e-06
mfap4	1150	-7.76643	3.54577	5.47045e-10	4.7945e-08
tlr21	3055	-7.71987	5.06295	2.71401e-14	1.69379e-11
im:7154036	1050	-7.71657	3.29163	2.15321e-09	1.46002e-07
si:rp71-68n21.9	2212	-7.70411	4.73623	3.20846e-12	6.52664e-10
havcr1	1184	-7.7005	6.64143	2.61798e-13	9.3775e-11
f11r.1	1749	-7.65514	3.72182	1.04889e-13	4.7334e-11
si:dkeyp-104b3.21	839	-7.60183	4.52276	8.60351e-09	4.77306e-07
si:dkey-1h24.6	1705	-7.56723	4.30977	6.97227e-09	4.01686e-07
itgae.1	2608	-7.54668	5.48098	1.22246e-11	2.07655e-09
si:dkeyp-68b7.12	6213	-7.54631	5.15099	3.88843e-14	2.06677e-11
dnase1l4.2	3425	-7.53575	4.84822	1.83862e-11	2.75409e-09
lgals3bpb	1994	-7.47349	11.7768	2.45063e-14	1.64873e-11
fam83ha	7192	-7.46836	3.02947	2.39686e-12	5.19645e-10
ccl34b.1	503	-7.46171	10.0474	4.44469e-14	2.21925e-11
si:ch211-214p13.9	1654	-7.38678	3.65193	8.28456e-08	3.29721e-06
gpat3	2637	-7.3775	3.29492	1.19165e-10	1.2349e-08
apoc1	783	-7.36563	8.70788	5.69593e-11	6.85049e-09
fut7	1275	-7.35632	3.69636	2.30143e-09	1.55413e-07
ms4a17a.6	962	-7.34765	6.15898	1.07439e-13	4.7334e-11
wasa	2502	-7.34092	4.24808	8.52335e-14	4.01255e-11
cx32.2	1071	-7.30629	4.56792	1.48915e-10	1.46927e-08
lgals9l1	2201	-7.26349	7.96359	6.64275e-15	5.47263e-12
ikbke	2508	-7.26117	3.38868	3.14347e-09	2.02324e-07
si:dkey-7i4.24	1564	-7.25879	3.81629	6.65521e-08	2.72104e-06
adam8a	3251	-7.25647	3.1472	2.11341e-08	1.04572e-06
arhgap27	4401	-7.21943	5.04568	1.90972e-13	7.15146e-11
myo1f	3684	-7.21098	4.32016	2.16793e-11	3.16115e-09
trim33l	4150	-7.20774	3.38234	6.80844e-10	5.69455e-08
gpr18	945	-7.20009	5.42409	3.94544e-11	5.28529e-09
si:dkey-238d18.5	2429	-7.12827	5.22419	8.22293e-10	6.74076e-08
anxa4	1485	-7.10838	5.40443	3.31227e-13	1.13701e-10
kcnj10a	1843	-7.09252	3.07138	1.77066e-09	1.26299e-07
tk1	2754	-7.07147	3.17544	1.01186e-09	8.09337e-08
zgc:123107	1985	-7.05689	5.89683	1.80516e-12	4.15341e-10
mrc1b	3699	-7.04138	6.29467	2.48931e-11	3.59793e-09
inpp5d	2826	-7.01212	6.08079	1.53069e-13	5.86539e-11
si:dkey-33c9.6	2802	-6.99607	3.30415	1.02447e-10	1.10328e-08
il1fma	1744	-6.99208	3.00325	1.564e-09	1.14027e-07
slc43a3b	2532	-6.99121	4.26709	1.69547e-11	2.61598e-09
lpxn	1249	-6.9908	3.41324	8.36755e-08	3.32222e-06
ncf1	2133	-6.97863	5.3966	1.61366e-11	2.55656e-09
tpst2	2939	-6.9511	3.35585	5.3389e-11	6.61434e-09
edaradd	1887	-6.9351	3.60699	1.24116e-06	3.41939e-05
itgae.2	3070	-6.90987	4.97863	7.64717e-12	1.41576e-09
fybb	2969	-6.90743	5.09658	7.94838e-13	2.18276e-10
si:ch211-191c10.1	778	-6.89614	4.19437	4.58577e-13	1.45307e-10
cxcr3.2	1893	-6.89313	5.74566	8.74667e-12	1.60132e-09
ptk2ba	3201	-6.87709	3.86606	6.65594e-09	3.84807e-07
si:dkey-33i11.1	1891	-6.87032	4.64038	3.36504e-11	4.69879e-09
esco2	2339	-6.87023	3.00189	1.96075e-11	2.88458e-09
dok2	1591	-6.8158	3.37341	1.58977e-12	3.74208e-10
ptpn6	825	-6.8136	5.66474	1.7613e-11	2.67942e-09
gpr183a	1448	-6.79298	5.0141	3.53133e-12	6.92688e-10
fxyd1	1072	-6.77715	4.50452	2.92205e-12	6.25281e-10
si:zfos-741a10.3	1108	-6.77401	4.53716	2.50157e-14	1.64873e-11
rgs18	1694	-6.76696	5.68629	1.51988e-11	2.43137e-09
smc4	4193	-6.73144	3.79668	8.6108e-08	3.41058e-06
cyba	1033	-6.72796	6.84775	3.59266e-15	3.40631e-12
prkacba	2483	-6.715	4.40507	5.48805e-08	2.34287e-06
zgc:123010	4414	-6.69991	3.7256	1.32288e-10	1.33724e-08
si:dkey-27h10.2	1009	-6.67355	3.12855	3.70022e-10	3.38714e-08
ikzf1	2301	-6.63884	4.76291	3.44096e-07	1.14078e-05
abo	1238	-6.63256	3.99887	1.03153e-07	3.98047e-06
cd4-1	2043	-6.61853	4.04807	8.18074e-05	0.0012899
slc7a7	2395	-6.61253	3.76863	6.18056e-11	7.3264e-09
clic1	2440	-6.58656	6.70425	3.34816e-12	6.69308e-10
itgb2	3489	-6.57167	6.74009	5.27103e-13	1.57911e-10
ccdc88b	5067	-6.56981	4.29494	6.51869e-09	3.79376e-07
skap2	1524	-6.55845	4.7765	3.75048e-10	3.41418e-08
si:ch211-198c19.1	920	-6.54565	4.18635	2.53775e-11	3.60292e-09
zgc:153317	827	-6.54449	4.96543	4.00983e-13	1.29549e-10
cd22	1834	-6.49337	3.25723	9.4599e-09	5.16129e-07
gmip	3356	-6.39194	4.81256	7.3532e-11	8.59281e-09
rac2	1163	-6.36626	6.79542	1.17577e-12	2.98048e-10
gsto2	1088	-6.3644	6.07669	3.59476e-13	1.18462e-10
ctsk	1639	-6.36243	5.55315	4.79748e-11	6.17563e-09
capgb	1902	-6.35208	5.90306	4.76915e-11	6.17563e-09
grapa	1419	-6.32967	3.97056	8.28885e-11	9.46857e-09
kif11	3677	-6.31907	3.11613	1.13482e-10	1.18344e-08
krt18b	1889	-6.29179	5.72433	8.56669e-11	9.53739e-09
coro1a	1813	-6.29029	8.89413	1.82844e-15	2.73883e-12
ltb4r	3752	-6.26428	3.29713	1.14113e-09	8.95352e-08
myo1g	2997	-6.25781	4.76075	1.41423e-10	1.42087e-08
arpc1b	1702	-6.24955	7.9927	3.72116e-15	3.40631e-12
wipf1a	1851	-6.23643	4.76215	2.78437e-08	1.32916e-06
cxcl11.5	259	-6.23483	3.4404	1.33439e-08	7.06972e-07
zgc:193725	516	-6.2333	5.62631	1.15838e-12	2.98048e-10
tprg1	1587	-6.22348	3.96049	3.01041e-08	1.42536e-06
grn1	1618	-6.21813	6.38397	1.68121e-10	1.62949e-08
itm2bb	1505	-6.21482	7.69458	7.37498e-16	1.21518e-12
knl1	5496	-6.21044	3.37677	1.14564e-06	3.23232e-05
si:ch73-380l3.3	1529	-6.20687	3.90615	1.16369e-09	9.08725e-08
grna	4163	-6.16682	7.45598	1.13733e-12	2.97456e-10
spi1a	2287	-6.16146	5.98418	1.25675e-13	5.0506e-11
fam117ab	2156	-6.15802	3.01412	9.45183e-09	5.16129e-07
hck	7256	-6.12147	6.31479	1.1156e-13	4.7334e-11
zgc:110216	871	-6.1172	3.17556	5.16373e-10	4.57434e-08
ssuh2.4	1248	-6.11585	3.45448	1.40679e-09	1.04885e-07
zgc:110540	1584	-6.11066	3.98398	1.49754e-08	7.73511e-07
fgl2a	2524	-6.10368	3.45277	1.81732e-09	1.27966e-07
ano6	4205	-6.09562	4.5617	2.52576e-11	3.60292e-09
wipf1b	4085	-6.09487	4.57372	6.47149e-10	5.44034e-08
unc93b1	2489	-6.09204	4.83401	3.70329e-11	5.04291e-09
klhl6	2488	-6.09164	3.44658	2.74079e-08	1.32015e-06
samsn1a	2760	-6.09047	5.63188	1.35605e-11	2.25694e-09
tnfsf10	1879	-6.07853	4.21198	2.0975e-10	2.00933e-08
hlx1	1489	-6.04149	3.33356	8.23487e-07	2.43165e-05
dnase2	3476	-6.01074	3.54114	4.63072e-10	4.16942e-08
csf2rb	2322	-5.99683	4.95664	1.90311e-09	1.32871e-07
si:dkey-211g8.5	982	-5.99598	4.28277	8.63642e-10	7.04467e-08
fcer1g	491	-5.98436	6.14376	2.87773e-13	1.00886e-10
itpr3	8687	-5.96891	3.5609	5.6271e-07	1.76004e-05
itgb7	2440	-5.95446	4.05019	1.02914e-07	3.98047e-06
rgs14a	2583	-5.93934	3.504	1.56495e-08	8.00795e-07
ms4a17a.10	1054	-5.90552	5.55339	3.17374e-12	6.52664e-10
si:ch211-113a14.18	650	-5.89343	3.78935	1.63987e-09	1.19031e-07
ttk	3330	-5.89199	3.74055	1.3607e-08	7.14021e-07
enpp1	3932	-5.86953	6.92482	1.93961e-11	2.87918e-09
kel	2890	-5.86268	3.56054	4.29209e-08	1.90622e-06
slc29a1b	4805	-5.86213	3.1339	1.25558e-09	9.66736e-08
ptprja	5618	-5.85364	4.6491	4.49478e-08	1.9769e-06
mpeg1.1	2634	-5.83591	6.79526	8.38995e-11	9.46857e-09
atp6v0e1	836	-5.78222	4.92598	2.55836e-11	3.60292e-09
si:dkey-102g19.3	838	-5.73796	3.02326	1.15013e-06	3.23945e-05
dnph1	667	-5.7363	3.29329	1.34001e-08	7.0767e-07
si:ch211-79k12.1	1840	-5.73159	6.15925	5.37914e-11	6.61434e-09
me1	2067	-5.71822	3.02084	2.68268e-08	1.29626e-06
ponzr1	1435	-5.71062	7.74013	1.44871e-11	2.38705e-09
grn2	783	-5.70132	3.96843	3.98402e-08	1.80185e-06
zgc:171506	1295	-5.69589	3.46378	1.86476e-08	9.30622e-07
si:ch211-246e12.3	1370	-5.68653	3.12944	2.74814e-08	1.32015e-06
rin3	5791	-5.68382	3.42252	2.60986e-08	1.26851e-06
fabp11a	674	-5.67152	4.46277	1.332e-06	3.6397e-05
si:ch73-226l13.2	926	-5.6658	5.21554	3.17141e-07	1.05566e-05
si:ch211-136m16.8	6759	-5.63294	3.49309	2.21509e-07	7.73263e-06
zgc:110339	1040	-5.60424	4.4191	3.86837e-11	5.22451e-09
si:dkey-265e15.2	3382	-5.6029	3.23936	1.38116e-09	1.03915e-07
zgc:101783	1582	-5.59431	3.23463	1.58291e-08	8.0748e-07
aplnrb	2087	-5.57484	4.61718	7.99764e-09	4.55976e-07
f13a1b	3162	-5.57336	4.34521	9.50608e-09	5.16936e-07
slc3a2a	2079	-5.57244	5.75178	1.69374e-09	1.21868e-07
cxcl8b.1	714	-5.54711	3.68557	0.000248328	0.00334016
eef1da	1607	-5.53799	7.74096	5.00356e-13	1.55554e-10
gnpda1	1346	-5.53174	4.24265	1.05916e-10	1.1187e-08
alox5ap	1304	-5.5002	3.69881	5.51812e-08	2.34335e-06
wee2	2245	-5.47644	3.15867	1.50431e-08	7.74581e-07
si:ch211-269k10.5	1205	-5.47061	4.16108	7.24575e-09	4.14543e-07
ahnak	20569	-5.44864	4.48299	3.08775e-09	2.00371e-07
dhrs9	1351	-5.44507	3.51788	2.33483e-08	1.14157e-06
blnk	3517	-5.43461	5.20238	2.05356e-09	1.40985e-07
arhgap17b	1904	-5.42888	4.5313	1.7938e-09	1.27399e-07
mpzl2b	1608	-5.42569	3.95108	7.09184e-08	2.87106e-06
grap2a	1829	-5.41182	6.07065	5.15615e-11	6.53522e-09
tlr3	3161	-5.40996	5.51713	6.58273e-07	2.03497e-05
lpar5a	1571	-5.39378	4.69099	3.3507e-09	2.11531e-07
hcls1	2495	-5.38296	6.00667	3.49817e-10	3.22007e-08
apbb1ip	3287	-5.36059	5.59408	4.48896e-08	1.9769e-06
gpr65	1331	-5.33736	3.25469	5.61898e-08	2.37253e-06
plekhf1	1225	-5.33663	4.53901	5.68697e-10	4.9579e-08
antxr1c	6703	-5.33535	3.73568	8.14009e-08	3.24756e-06
tlcd1	1076	-5.33352	3.02381	3.75965e-08	1.72556e-06
rgn	1490	-5.33302	3.17414	4.31103e-09	2.62114e-07
notch1a	6096	-5.31687	3.9619	7.39366e-10	6.09127e-08
adcy7	10228	-5.29656	4.91104	9.24496e-11	1.0088e-08
pfn1	1540	-5.29118	10.6985	1.06578e-12	2.83239e-10
wasf2	3321	-5.29117	4.36161	3.21759e-09	2.06289e-07
rnaset2l	995	-5.2852	6.42702	1.49424e-11	2.41378e-09
pik3r5	2823	-5.28036	3.43634	3.51279e-07	1.16226e-05
si:dkey-27i16.2	706	-5.27799	7.12168	3.37152e-12	6.69308e-10
wasb	1735	-5.26685	6.27672	4.90879e-08	2.13409e-06
itpkcb	3844	-5.25908	3.16815	1.11627e-06	3.16027e-05
si:ch211-212k18.7	2048	-5.24928	7.47717	3.48202e-11	4.82128e-09
kpna2	1933	-5.24507	4.90856	5.72339e-10	4.96338e-08
gstt1a	1674	-5.22965	3.65893	2.18924e-07	7.65862e-06
si:ch73-248e21.5	2779	-5.22912	4.51375	3.85817e-08	1.76097e-06
il2rga	1135	-5.22598	5.54813	2.62745e-09	1.73377e-07
ampd3b	3081	-5.22563	4.2356	3.11444e-08	1.46619e-06
cyfip1	4645	-5.2206	5.93029	1.50419e-10	1.47527e-08
ostf1	3322	-5.21755	3.47473	3.45145e-09	2.15415e-07
pparg	1581	-5.21527	3.78603	4.91882e-09	2.94718e-07
rbp4	1122	-5.18913	4.2401	0.000482385	0.00581225
mtmr8	3126	-5.17214	3.86312	2.67528e-08	1.29626e-06
rhogb	1957	-5.17203	5.44193	1.18547e-11	2.03469e-09
rgl1	4786	-5.16981	3.33571	8.70574e-08	3.43992e-06
ephx2	2170	-5.15157	3.47283	1.09975e-06	3.12424e-05
stx7l	2408	-5.14742	3.22078	1.24974e-07	4.69065e-06
ifi30	1041	-5.14192	6.00176	1.81159e-09	1.27966e-07
stx11a	1526	-5.14187	4.86304	6.32414e-09	3.69513e-07
snx33	4452	-5.12527	3.99031	8.30769e-09	4.64019e-07
plk1	2538	-5.08974	4.2075	3.58729e-07	1.18453e-05
snx9b	2965	-5.08741	4.62634	1.11383e-07	4.2287e-06
abi3a	2447	-5.08691	4.93154	1.24826e-10	1.27893e-08
tacc3	3275	-5.07545	3.46347	2.69267e-07	9.12903e-06
chaf1b	2548	-5.02924	3.14524	2.16296e-06	5.60363e-05
slco2b1	2782	-5.00378	5.01146	3.64898e-09	2.26031e-07
si:ch211-102c2.4	972	-5.00336	6.01304	8.29556e-09	4.64019e-07
top2a	2839	-4.98978	3.90669	1.38013e-08	7.21916e-07
rasgrp4	3443	-4.9744	5.00574	5.90886e-09	3.47715e-07
arhgap4a	2964	-4.97419	4.49072	1.22204e-06	3.38952e-05
myh9a	6842	-4.96904	3.87469	9.27234e-08	3.62039e-06
lifrb	3101	-4.96743	3.67384	6.69205e-07	2.06103e-05
adap2	1291	-4.96277	4.10595	1.04564e-07	4.00674e-06
xpnpep2	2837	-4.96094	3.55544	9.19749e-07	2.6448e-05
myd88	1485	-4.94839	4.5022	1.34945e-08	7.10377e-07
pitpnaa	1799	-4.93084	4.36478	2.79111e-08	1.32916e-06
si:ch211-226m16.2	2945	-4.92927	5.83185	3.88522e-08	1.76355e-06
f13a1a.1	3541	-4.90229	4.26077	0.000575439	0.0067436
cdh30	2492	-4.89217	3.0878	5.37461e-05	0.000899061
prkcq	2128	-4.88934	3.55541	8.19481e-06	0.000180516
ctsl.1	1434	-4.87462	3.32504	0.00269965	0.0234487
irf5	2539	-4.87107	3.07413	1.94604e-06	5.08967e-05
zgc:101723	915	-4.86052	3.76423	6.1404e-08	2.52938e-06
si:dkey-183p4.10	3441	-4.83741	4.91186	2.30657e-07	7.98524e-06
nutf2l	833	-4.83191	4.56204	5.55551e-08	2.35317e-06
flvcr2b	2505	-4.82902	4.32886	8.34296e-07	2.45477e-05
itprid2	4552	-4.76987	4.81981	9.39349e-10	7.58709e-08
tmc8	3177	-4.75391	3.62914	5.67404e-06	0.000131308
lcp2a	2034	-4.7439	5.63884	2.98244e-10	2.77637e-08
map3k1	4122	-4.74336	4.80658	1.58345e-07	5.82377e-06
jac2	1016	-4.73677	5.44593	0.000826705	0.00906899
glb1l	2095	-4.71537	4.90135	8.24285e-09	4.63541e-07
fli1b	2827	-4.71029	5.92714	8.92255e-07	2.58378e-05
ppp1r18	4779	-4.70587	4.51135	4.47471e-09	2.70072e-07
sh3bp2	1485	-4.7015	4.58496	7.65466e-07	2.30445e-05
lrrc8da	5389	-4.69889	4.26858	3.10964e-06	7.67029e-05
igf2b	3385	-4.69883	5.11144	9.73575e-09	5.27684e-07
jac3	1289	-4.684	3.63591	0.000609933	0.00705254
si:dkey-25o16.4	5084	-4.68241	3.18555	6.96711e-05	0.00112325
snx22	1066	-4.66849	3.90931	3.29201e-09	2.10242e-07
plxnc1	3171	-4.6396	4.78313	3.18462e-10	2.94792e-08
si:dkey-204f11.64	3053	-4.6307	4.14585	2.32572e-08	1.1405e-06
si:dkey-171c9.3	2451	-4.62265	5.14288	1.96705e-06	5.12834e-05
cd82b	3342	-4.61856	3.96336	1.14283e-05	0.000238359
arhgef10	4004	-4.61737	3.07474	2.35856e-07	8.11316e-06
si:dkey-188i13.6	1380	-4.59616	5.82133	1.80032e-10	1.73473e-08
ms4a17a.9	2247	-4.58961	3.84889	5.95964e-08	2.47954e-06
uap1l1	1911	-4.56385	4.2487	4.82431e-07	1.53456e-05
mfng	1857	-4.55618	5.88968	6.98036e-07	2.13783e-05
anxa2a	1639	-4.53833	4.16112	8.92481e-06	0.000193492
kctd12.2	1479	-4.53759	6.04234	6.99596e-13	1.95377e-10
cfp	5130	-4.5368	5.4558	7.62498e-11	8.84766e-09
anxa5b	1913	-4.52723	3.86297	6.5232e-06	0.000148457
ccl34b.8	533	-4.51707	5.78437	0.000129394	0.00191384
mhc2a	1590	-4.51251	8.41473	5.32889e-08	2.29254e-06
si:dkeyp-67a8.2	6843	-4.51068	4.78531	1.68206e-06	4.4928e-05
rin2	6162	-4.4969	4.44012	1.07556e-08	5.75389e-07
niban1b	3364	-4.49176	3.28979	7.87683e-08	3.16552e-06
tmcc3	3507	-4.47317	4.8562	3.66735e-09	2.26318e-07
capn2b	2454	-4.4521	3.26158	4.14424e-05	0.000722589
si:ch73-234b20.5	862	-4.43896	4.4209	5.51393e-08	2.34335e-06
ehd4	2052	-4.43713	5.55876	1.4552e-07	5.38815e-06
galnt6	3301	-4.43627	3.62236	4.16143e-06	9.89978e-05
dnajc5gb	2669	-4.43348	3.79357	5.93377e-08	2.47521e-06
timd4	1424	-4.42573	3.22387	1.30969e-05	0.000269411
zgc:153654	2161	-4.39584	6.49261	9.65412e-08	3.74285e-06
olig1	1477	-4.38947	4.94993	1.06887e-08	5.73674e-07
gnsb	1934	-4.38784	3.29498	1.20595e-06	3.35084e-05
ace2	2870	-4.38385	3.37079	1.49163e-05	0.00030046
glud1a	2482	-4.37718	6.4232	2.11084e-12	4.63738e-10
jak3	3612	-4.37386	3.24781	8.31052e-07	2.4496e-05
ccr9a	1856	-4.36801	5.38107	8.79272e-07	2.57331e-05
si:ch73-248e21.7	2336	-4.36209	4.87447	2.24696e-07	7.82732e-06
dnase1l1	1741	-4.35644	4.60065	1.15341e-11	2.02178e-09
tuba8l3	1556	-4.35176	4.69282	8.00419e-08	3.20888e-06
man2a1	4037	-4.34766	3.92296	9.03367e-07	2.60223e-05
rnaseka	1000	-4.3441	4.57385	9.47984e-10	7.61948e-08
btk	2634	-4.30352	4.27973	4.64364e-06	0.000109461
mhc1zja	1388	-4.28632	3.22725	2.18439e-06	5.6414e-05
lgals9l3	2454	-4.28251	7.32668	1.83762e-09	1.28845e-07
tagapb	2316	-4.28188	6.45975	6.97971e-08	2.83263e-06
pitpnc1b	2094	-4.28134	3.36557	2.27888e-06	5.84876e-05
rhof	1448	-4.25959	4.22627	8.56031e-05	0.00134332
unc13d	4192	-4.25092	4.64969	1.93365e-06	5.0653e-05
prg4a	1999	-4.25092	5.4439	9.37331e-12	1.69719e-09
si:dkey-262k9.4	1360	-4.25086	4.8225	1.30216e-09	9.88914e-08
bcam	2220	-4.2465	3.04326	7.19897e-07	2.19256e-05
cldnk	1729	-4.24176	3.68542	2.67079e-06	6.69812e-05
slc43a1a	2967	-4.24014	3.21292	9.30015e-06	0.000200312
si:dkey-185m8.2	7434	-4.23639	5.11327	1.5826e-06	4.2539e-05
spi1b	2376	-4.22694	6.05869	3.02486e-09	1.97781e-07
tmem176l.3a	4764	-4.21548	3.6107	2.8174e-05	0.000519847
mob1a	1647	-4.20275	6.43284	5.36027e-11	6.61434e-09
cdk2	1734	-4.1989	3.37431	7.33784e-08	2.96337e-06
gpr17	1020	-4.1837	4.24318	2.34552e-05	0.000442693
arhgap31	4378	-4.18077	3.22664	9.02483e-07	2.60223e-05
cabz01093075.1	5437	-4.17787	3.04295	1.61811e-06	4.34227e-05
mag	2496	-4.17651	4.63378	1.06564e-05	0.000224534
nkx2.2a	1791	-4.1739	3.08758	9.23668e-05	0.00142477
si:dkey-68o6.6	1192	-4.17122	3.73847	1.10217e-05	0.000231639
anxa3b	1864	-4.16644	6.91208	1.81904e-08	9.16583e-07
cnn2	2452	-4.16501	5.57236	5.76039e-10	4.96931e-08
ncf4	2216	-4.15616	3.76502	6.07223e-08	2.50757e-06
rbck1	2809	-4.14877	3.09565	1.92914e-06	5.06154e-05
gnaia	3744	-4.14553	5.30748	3.4416e-09	2.15415e-07
cyth4b	1752	-4.12273	3.90463	3.66787e-06	8.88756e-05
mpz	3017	-4.11663	7.06934	4.52898e-09	2.7235e-07
si:ch73-264p11.1	1747	-4.10983	3.11234	3.57927e-05	0.000640344
si:dkey-206d17.12	2209	-4.10883	3.76447	2.08975e-06	5.42248e-05
sult1st1	1614	-4.10863	3.09415	6.89674e-07	2.11616e-05
si:dkey-222f8.3	1731	-4.09626	4.82349	1.17792e-06	3.3064e-05
cmtm3	1705	-4.08909	4.28868	1.93086e-07	6.93133e-06
cybb	3495	-4.07785	6.48195	1.31227e-10	1.33471e-08
cdc25b	3191	-4.07471	5.30151	8.38831e-11	9.46857e-09
cxcl11.7	514	-4.07463	3.5295	7.3109e-06	0.000163283
hhipl1	3000	-4.07313	3.36754	4.51122e-08	1.9769e-06
sox10	3205	-4.07031	3.59497	8.75482e-06	0.000190559
malt3	2006	-4.05967	3.87173	5.73476e-06	0.000132527
swap70b	2777	-4.0561	5.54243	8.67169e-09	4.79474e-07
plp1b	2150	-4.0516	7.06386	4.21246e-07	1.36363e-05
cdca8	1916	-4.04963	3.09761	4.92545e-05	0.000838395
sh3bp1	2819	-4.04573	5.36589	7.57087e-06	0.000168347
rgs13	1279	-4.04065	5.09582	1.35413e-07	5.03657e-06
cdc14ab	4587	-4.0341	3.35398	9.35917e-06	0.00020132
si:ch73-335m24.2	1369	-4.0291	3.64531	6.02039e-06	0.000138159
serinc2	1963	-4.0241	5.65218	2.77552e-14	1.69379e-11
srgn	1961	-3.99485	7.40607	4.1933e-09	2.56663e-07
lgals2a	883	-3.98491	8.29942	7.19294e-17	1.9753e-13
si:ch211-119e14.1	3041	-3.95922	6.38595	7.01682e-06	0.000157945
tgfbi	3037	-3.94993	3.87789	0.000217605	0.00297303
etv4	1974	-3.93551	5.75638	4.2058e-09	2.56663e-07
myo9b	7892	-3.93452	4.39962	5.664e-08	2.38076e-06
zgc:64051	1448	-3.9329	7.54731	1.22e-05	0.000253173
mhc2dab	1428	-3.92296	4.94709	0.00376207	0.0302822
si:dkey-188i13.8	851	-3.90794	3.22375	3.82099e-06	9.19103e-05
olig2	1684	-3.9044	5.1181	1.96905e-07	7.02772e-06
timp4.3	912	-3.89369	5.45779	1.55646e-08	7.98936e-07
si:dkeyp-1h4.6	1676	-3.88993	5.97858	2.86331e-06	7.17004e-05
s100a10b	872	-3.88792	6.07542	7.34177e-07	2.23193e-05
arhgap12a	3954	-3.88379	3.5744	3.99148e-08	1.80185e-06
npc2	1236	-3.88183	7.4907	3.01494e-15	3.10482e-12
itpka	3108	-3.86342	3.74754	5.3742e-06	0.000125072
robo4	3715	-3.85036	4.31353	8.33753e-06	0.000182926
grap2b	2396	-3.847	5.56503	2.53574e-07	8.6504e-06
si:dkey-172h23.2	12090	-3.84563	4.32538	9.32277e-08	3.63147e-06
ctsa	748	-3.84453	4.3817	3.9308e-10	3.55867e-08
malt2	3148	-3.8371	4.14798	0.000123575	0.00184267
wdfy4	2886	-3.8299	3.64726	5.03681e-06	0.000118053
klf12a	2479	-3.82843	4.12412	4.00717e-08	1.80399e-06
ehbp1l1b	9265	-3.82825	5.44467	3.19345e-08	1.4991e-06
acsl4b	3641	-3.82697	3.03601	6.07118e-06	0.00013913
aspm	10507	-3.80665	4.03796	1.00612e-05	0.000213631
si:ch211-166a6.5	4277	-3.78735	3.64966	3.3753e-09	2.1227e-07
reep3a	3865	-3.77709	3.21264	7.2657e-06	0.000163102
lrrfip1a	6555	-3.76733	4.92381	1.78328e-07	6.5151e-06
dlgap5	3267	-3.76275	3.25876	5.22667e-05	0.000878774
ninj2	1002	-3.76241	4.06333	2.64286e-06	6.63818e-05
sypl2b	1966	-3.75626	5.25293	1.11188e-05	0.000233084
sema5a	4513	-3.74902	6.67033	8.86046e-11	9.73292e-09
si:ch73-86n18.1	1054	-3.74737	3.70179	9.75153e-06	0.000208941
foxj2	1598	-3.73228	3.88874	4.87462e-08	2.12484e-06
slc7a10b	2242	-3.72931	3.34485	6.28693e-06	0.000143476
ctss2.1	1227	-3.71608	7.51029	2.78211e-08	1.32916e-06
aplnra	1708	-3.7147	5.50186	4.02051e-07	1.31964e-05
si:cabz01074946.1	1023	-3.70181	5.05155	4.70438e-05	0.000809124
mki67	8187	-3.68279	5.56854	1.121e-06	3.16821e-05
si:zfos-464b6.2	2116	-3.68003	3.9506	0.000121552	0.00181579
pygb	2860	-3.67725	3.48454	1.36927e-05	0.000280965
zgc:101583	4188	-3.67498	3.50691	2.51014e-05	0.000470531
si:ch211-197h24.8	2249	-3.65166	3.06674	9.27368e-05	0.00142806
mapre1a	1699	-3.6467	6.70148	2.32011e-15	3.10482e-12
si:dkey-76b14.2	2932	-3.64382	3.41056	2.02254e-05	0.00038977
elk3	2275	-3.63811	4.58869	9.12361e-08	3.57078e-06
spata2l	2307	-3.63613	3.07766	3.39144e-05	0.000614433
snx10b	2241	-3.63464	3.52156	2.44645e-06	6.20157e-05
zgc:110591	2333	-3.62196	4.84682	1.04194e-06	2.97541e-05
cgas	810	-3.61538	3.28765	0.000182589	0.00255827
ctss2.2	1267	-3.61405	6.57953	4.66745e-07	1.49042e-05
cyp3c1	2217	-3.61023	4.2139	1.85919e-05	0.000363822
zfp36l1a	1899	-3.60736	6.94152	6.90249e-13	1.95377e-10
syngr2a	3500	-3.6028	4.52722	1.68238e-06	4.4928e-05
fzd2	2440	-3.60191	5.84965	1.33067e-09	1.00575e-07
epdl1	1983	-3.59239	3.48275	2.76976e-05	0.000512779
npsn	1553	-3.5739	3.67687	0.00363888	0.0295858
il7r	1617	-3.57014	5.52923	0.00135364	0.0135093
si:ch73-237c6.1	3659	-3.56836	4.24299	1.10556e-06	3.13533e-05
tcea3	2108	-3.55634	4.12917	3.9733e-06	9.51571e-05
asah1b	1726	-3.55355	6.56524	3.04852e-12	6.4398e-10
rab44	6889	-3.55272	4.77344	7.30127e-10	6.07591e-08
jpt2	2146	-3.54592	6.25981	1.43506e-10	1.43219e-08
fam49ba	2280	-3.54554	5.33524	3.20356e-08	1.49958e-06
ctbs	1568	-3.52992	3.57368	8.30673e-06	0.000182493
tpp1	2198	-3.52027	4.47422	1.24967e-10	1.27893e-08
icn	408	-3.50698	4.94438	9.60399e-06	0.000206317
cd59	1144	-3.48787	7.79852	1.46539e-05	0.00029626
rxraa	1699	-3.47169	4.36248	4.11048e-08	1.84546e-06
bdh2	1719	-3.44745	3.13804	2.30794e-06	5.90495e-05
arhgef3l	2286	-3.44741	4.9916	2.8606e-07	9.63888e-06
rilpl2	2009	-3.44375	3.14583	0.000294464	0.00383245
b3gnt3.4	1427	-3.41535	3.54561	1.06015e-05	0.00022395
si:ch73-158p21.3	2343	-3.41057	4.97835	2.06811e-06	5.3748e-05
draxin	8513	-3.41039	4.53034	3.72704e-06	8.99128e-05
mov10b.2	3131	-3.39212	4.92879	2.29273e-06	5.87517e-05
eif4ebp3l	1181	-3.39051	3.35376	6.01225e-06	0.000138159
sh2b3	1791	-3.38558	3.65105	0.000199764	0.00274851
tor4aa	2819	-3.36987	3.60739	0.000585741	0.00682792
dennd2c	3685	-3.36923	3.39437	1.79516e-05	0.00035297
arhgap15	1680	-3.36856	4.05418	1.94819e-09	1.34875e-07
paox1	2182	-3.34843	3.47028	0.000154701	0.00222815
mmp14b	4473	-3.34366	4.57759	1.30148e-07	4.86271e-06
si:ch1073-385f13.3	1331	-3.33492	4.23091	9.97408e-06	0.000212329
cib1	1353	-3.33478	4.83465	1.56346e-06	4.20932e-05
tpx2	2748	-3.319	3.1762	0.00173311	0.016478
si:ch1073-90m23.1	1924	-3.3187	3.04066	1.10699e-05	0.000232356
si:ch211-105j21.9	1005	-3.31672	4.50353	0.00410786	0.0324008
dock8	7072	-3.30149	5.97504	4.78529e-07	1.52509e-05
myrf	5038	-3.30071	3.16678	0.00158062	0.0153561
peli2	2448	-3.29891	3.42594	0.00057912	0.0067785
pacc1	2017	-3.29779	3.50078	0.000399848	0.00494617
rgcc	1661	-3.29604	3.9168	1.89289e-07	6.82476e-06
glipr1a	828	-3.29207	3.44523	1.35495e-05	0.000278373
ugt8	5298	-3.28093	4.01	0.000652647	0.0074523
smc2	4073	-3.27565	3.84774	0.000267125	0.0035524
p2ry10	1445	-3.27489	3.0249	0.00256454	0.0224646
rbm47	7222	-3.27403	5.1249	3.34874e-05	0.000609019
gzm3	802	-3.26733	3.87836	0.00378838	0.0304054
fa2h	5711	-3.26491	3.49675	0.000130066	0.00192206
2012-09-01	4427	-3.26434	6.48762	5.20612e-10	4.58724e-08
parvg	1492	-3.25983	5.40895	6.58219e-07	2.03497e-05
prex1	7934	-3.25416	5.8839	1.04829e-06	2.98834e-05
ada2b	2228	-3.24834	3.00663	1.03841e-06	2.97046e-05
ptbp1a	4314	-3.24445	4.97636	1.11815e-05	0.000234101
cdca7a	1741	-3.21906	3.48481	0.000874411	0.00949748
btr09	2511	-3.19686	3.97597	1.80964e-06	4.79379e-05
fhod1	5712	-3.18398	3.24527	8.91096e-05	0.00138627
p2rx7	1877	-3.18015	5.08777	1.86394e-07	6.74991e-06
cxcr4b	1674	-3.173	7.52355	3.12918e-06	7.70695e-05
gab1	4453	-3.16926	5.10965	5.30396e-07	1.67742e-05
lpar5b	1301	-3.14392	3.57483	0.00161066	0.0155653
litaf	2374	-3.14284	7.30964	1.94439e-12	4.38874e-10
c7b	2612	-3.1418	5.58682	0.000144058	0.00209871
txnipa	2753	-3.13304	7.36988	6.52095e-11	7.67469e-09
si:dkey-237j10.2	5656	-3.13301	4.55087	1.63243e-10	1.59157e-08
sox9a	1784	-3.13135	3.82358	5.80194e-06	0.000133704
tmem63a	2958	-3.12369	3.03094	0.00333484	0.0276399
sash3	1558	-3.12056	6.85863	3.12569e-07	1.04255e-05
slc38a5a	3639	-3.11652	3.37337	0.00089117	0.00964137
si:dkey-26c10.5	1250	-3.10145	6.51182	4.00843e-11	5.32636e-09
frmd4ba	4516	-3.0986	3.8379	1.70548e-05	0.000336944
cspg5b	3332	-3.09541	3.15078	9.96544e-05	0.0015232
cxcl32b.1	798	-3.08104	4.92665	0.00496721	0.0376817
ptprc	3997	-3.05266	6.82026	5.65858e-09	3.35147e-07
bin2b	2438	-3.04751	5.52821	1.70957e-05	0.000337349
zgc:153151	2503	-3.03525	3.0317	0.00222174	0.0199496
iqgap1	7680	-3.02729	5.64279	2.60492e-08	1.26851e-06
phf19	4073	-3.02402	3.73817	0.000382987	0.00476982
alox12	3595	-3.00358	4.26455	5.9357e-10	5.05244e-08
itpr2	5841	-3.00032	5.34063	1.83421e-08	9.20381e-07
ociad2	1483	3.00855	3.95652	2.14217e-05	0.000408053
scube1	4038	3.03083	3.56303	0.00619542	0.0444802
kitb	2903	3.14295	3.51704	0.000529549	0.00627274
fmnl3	5605	3.16583	4.07717	0.000187156	0.00260986
tuft1a	3237	3.2843	4.99118	9.13881e-05	0.0014152
si:ch211-256a21.4	1424	3.74336	3.18418	0.000857135	0.0093468
atf3	2701	3.83071	6.55765	1.97863e-09	1.3641e-07
dynll1	1000	3.85469	11.0417	2.73335e-15	3.10482e-12
scgn	1605	3.8637	3.58397	0.00157487	0.0153093
cd83	888	3.98903	6.17162	1.78927e-06	4.75514e-05
si:ch73-335l21.4	1499	4.18779	6.28041	1.8012e-05	0.000353315
homeza	2117	4.22013	3.78839	8.97288e-05	0.00139215
si:ch211-183d5.2	1057	4.30688	6.05242	7.30112e-06	0.000163283
si:dkey-31e10.1	777	4.34841	3.70351	1.55396e-07	5.7281e-06
hunk	1830	4.51941	4.76826	6.86862e-07	2.11146e-05
zgc:194101	777	4.61559	6.19655	4.33917e-07	1.39642e-05
si:dkey-31e10.5	766	4.62671	4.2736	2.44263e-07	8.38484e-06
si:ch211-217k17.10	1071	4.76452	4.67722	4.55948e-05	0.000785842
insm1a	1190	4.76579	3.08009	4.11199e-07	1.339e-05
traf3ip2l	1765	4.92348	4.36792	6.8744e-06	0.000155414
ifnphi1	823	5.40853	5.28598	3.8712e-08	1.76204e-06
cxcl18b	1101	6.87881	7.15905	1.76046e-09	1.26118e-07
GFP1	720	8.13491	10.8942	5.11823e-13	1.56172e-10
ifnphi2	546	9.14422	3.47916	3.78303e-08	1.73147e-06
