# Supplementary material for: A viral toolbox for conditional and transneuronal gene expression in zebrafish
Source: eLife. 2022 Jul 22;11:e77153. doi: 10.7554/eLife.77153 (PMC9307271; doi:10.7554/eLife.77153)
Supplement: Figure 3—source data 2. — Note that most GO terms are linked to immunity. GO terms linked to stress, cell death or synaptic functions are rare or absent. [file elife-77153-fig3-data2.xlsx]

## Sheet: All_sig_dif_gene_ontology
Gene Ontology term	Cluster frequency	Genome frequency	Corrected	FDR	FALSE	Genes annotated to the term
			P-value		Positives
immune system process	104 of 529 genes, 19.7%	1377 of 25457 genes, 5.4%	6.72e-28	0	0	cgas, ccl34b.1, c1qa, scube1, cd4-1, cxcl32b.1, ano6, cxcl11.5, ptk2ba, tnfsf10l, klhl6, rac2, cfp, ctsl.1, si:dkey-1h24.6, hlx1, blk, si:ch211-66k16.27, mhc2a, sh2b3, rgs18, slc7a7, fybb, tlr3, notch1a, ikzf1, c1qc, ccr9a, prg4a, unc93b1, p2ry12, igf2b, hck, mhc1zja, skap2, dok2, inpp5d, itgb2, cd74b, mfap4, gpr183a, ptpn6, zgc:123107, ifi30, cmklr1, ada2b, tlr8b, gpr65, cxcr3.2, ifnphi1, ctss2.…
immune response	61 of 529 genes, 11.5%	712 of 25457 genes, 2.8%	9.1e-18	0	0	cgas, ccr12a, ccl34b.1, c1qb, c1qa, ccl34b.8, tnfsf10, cxcl32b.1, cxcl11.5, ptk2ba, kita, tnfsf10l, klhl6, ctss2.2, cfp, ctsl.1, si:dkey-1h24.6, myd88, blk, si:ch211-66k16.27, cxcl18b, mhc2a, fybb, tlr3, c1qc, ccr9a, prg4a, unc93b1, hck, traf3ip2l, mhc1zja, cd74a, cd74b, mfap4, cfbl, zgc:123107, ptpn6, gpr183a, caspa, cmklr1, tlr8b, cxcr3.2, ctsk, ctss2.1, sla1a, tnfaip8l2a, tlr21, caspb, cxcr4b,…
regulation of immune system process	42 of 529 genes, 7.9%	460 of 25457 genes, 1.8%	1.69e-12	0	0	spi1b, cgas, c1qb, c1qa, ptk2ba, kita, klhl6, rac2, rhogb, wasb, si:dkey-1h24.6, myd88, blk, cdca7a, f11r.1, fam49ba, fybb, tlr3, c1qc, unc93b1, spi1a, igf2b, inpp5d, cd74a, cd74b, csf1rb, mfap4, cfbl, tlr8b, gpr65, ifnphi1, rhoga, lgals9l1, tlr21, cxcr4b, kitb, lgals9l3, c7b, csf1ra, zgc:173915, adam8a, anxa1a
cell migration	52 of 529 genes, 9.8%	818 of 25457 genes, 3.2%	1.55e-09	0	0	ccr12a, ccl34b.1, ccl34b.8, apoc1, cxcl32b.1, ano6, cxcl11.5, ptk2ba, kita, rac2, insm1a, nkx2.2a, lpxn, rhogb, wasb, myd88, cxcl18b, sema5a, plxnc1, fam83ha, ccr9a, csrp1a, sema4aa, inpp5d, itgb2, rhof, cnn2, gpr183a, cmklr1, coro1a, robo4, rgs14a, sox10, cxcr3.2, fmnl3, rhoga, fzd2, arhgap4a, cxcr4b, kitb, aplnra, itgb7, adam8a, csf1ra, aplnrb, mmp14b, lgals3b, p2rx7, anxa1a, ngfrb, olig2, cyba
cell chemotaxis	22 of 529 genes, 4.2%	160 of 25457 genes, 0.6%	4.24e-09	0	0	ccr12a, ccl34b.1, ccl34b.8, cxcl32b.1, ano6, cxcl11.5, gpr183a, ptk2ba, rac2, cmklr1, wasb, myd88, cxcl18b, cxcr3.2, cxcr4b, ccr9a, csf1ra, lgals3b, p2rx7, anxa1a, inpp5d, cyba
defense response	40 of 529 genes, 7.6%	542 of 25457 genes, 2.1%	8.14e-09	0	0	cgas, ccl34b.1, ccl34b.8, cxcl32b.1, cxcl11.5, ptk2ba, rac2, cybb, myd88, blk, si:ch211-66k16.27, cxcl18b, ncf1, tlr3, cd59, unc93b1, p2ry12, hck, mfap4, ptpn6, caspa, mpeg1.1, npsn, irf5, tlr8b, cxcr3.2, ifnphi1, sla1a, tnfaip8l2a, tlr21, caspb, cxcr4b, si:ch73-226l13.2, il1fma, adam8a, csf1ra, zgc:173915, pycard, anxa1a, ifnphi2
cell motility	53 of 529 genes, 10.0%	888 of 25457 genes, 3.5%	1.03e-08	0	0	ccr12a, ccl34b.1, ccl34b.8, apoc1, cxcl32b.1, ano6, cxcl11.5, ptk2ba, kita, rac2, insm1a, nkx2.2a, lpxn, rhogb, wasb, myd88, cxcl18b, sema5a, plxnc1, fam83ha, ccr9a, csrp1a, sema4aa, inpp5d, itgb2, rhof, cnn2, gpr183a, cmklr1, coro1a, robo4, rgs14a, sox10, cxcr3.2, fmnl3, rhoga, fzd2, anxa5b, arhgap4a, cxcr4b, kitb, aplnra, itgb7, adam8a, csf1ra, aplnrb, mmp14b, lgals3b, p2rx7, anxa1a, ngfrb, oli…
localization of cell	53 of 529 genes, 10.0%	888 of 25457 genes, 3.5%	1.03e-08	0	0	ccr12a, ccl34b.1, ccl34b.8, apoc1, cxcl32b.1, ano6, cxcl11.5, ptk2ba, kita, rac2, insm1a, nkx2.2a, lpxn, rhogb, wasb, myd88, cxcl18b, sema5a, plxnc1, fam83ha, ccr9a, csrp1a, sema4aa, inpp5d, itgb2, rhof, cnn2, gpr183a, cmklr1, coro1a, robo4, rgs14a, sox10, cxcr3.2, fmnl3, rhoga, fzd2, anxa5b, arhgap4a, cxcr4b, kitb, aplnra, itgb7, adam8a, csf1ra, aplnrb, mmp14b, lgals3b, p2rx7, anxa1a, ngfrb, oli…
leukocyte chemotaxis	19 of 529 genes, 3.6%	121 of 25457 genes, 0.5%	1.21e-08	0	0	ccl34b.1, ccl34b.8, cxcl32b.1, ano6, cxcl11.5, gpr183a, ptk2ba, rac2, wasb, myd88, cxcl18b, cxcr3.2, cxcr4b, csf1ra, lgals3b, p2rx7, inpp5d, anxa1a, cyba
leukocyte migration	22 of 529 genes, 4.2%	169 of 25457 genes, 0.7%	1.29e-08	0	0	ccl34b.1, ccl34b.8, cxcl32b.1, ano6, cxcl11.5, gpr183a, ptk2ba, rac2, rhogb, wasb, myd88, cxcl18b, cxcr3.2, rhoga, cxcr4b, adam8a, csf1ra, lgals3b, p2rx7, anxa1a, inpp5d, cyba
cell activation	25 of 529 genes, 4.7%	253 of 25457 genes, 1.0%	2.2e-07	0	0	cd74b, cd4-1, gpr183a, kita, si:dkey-1h24.6, myd88, blk, il7r, cxcr3.2, ptbp1a, fam49ba, im:7154036, lgals9l1, arpc1b, ikzf1, kitb, lgals9l3, jak3, p2ry12, igf2b, cd83, il2rga, anxa1a, skap2, cd74a
movement of cell or subcellular component	64 of 529 genes, 12.1%	1303 of 25457 genes, 5.1%	2.56e-07	0	0	ccl34b.1, cxcl32b.1, ano6, cxcl11.5, ptk2ba, rac2, lpxn, wipf1b, ccr9a, csrp1a, inpp5d, sema4aa, itgb2, myo1g, cnn2, gpr183a, kif11, cmklr1, kif23, cxcr3.2, fzd2, aplnra, aplnrb, mmp14b, ngfrb, olig2, cyba, ccr12a, cyfip1, apoc1, ccl34b.8, kita, insm1a, nkx2.2a, draxin, wasb, rhogb, myd88, cxcl18b, wasa, sema5a, plxnc1, fam83ha, myo9b, wipf1a, rhof, coro1a, mcamb, rgs14a, robo4, sox10, fmnl3, rho…
response to stimulus	205 of 529 genes, 38.8%	6725 of 25457 genes, 26.4%	4.13e-07	0	0	rab44, cgas, ccl34b.1, c1qa, scube1, cd4-1, cyth4b, ano6, cxcl11.5, atf3, entpd1, rac2, si:dkey-32n7.4, cfp, si:dkey-1h24.6, dock8, cybb, si:ch211-66k16.27, edaradd, mhc2a, sh2b3, rasgrp4, arhgap15, fybb, tlr3, notch1a, cd59, blnk, neil3, mhc1zja, csrp1a, hunk, sema4aa, lpar5b, si:ch211-246e12.3, rxraa, tagapb, cdk2, p2ry10, lpar5a, cnn2, f13a1b, mpeg1.1, gpr183a, ptpn6, zgc:123107, npsn, cmklr1,…
leukocyte activation	23 of 529 genes, 4.3%	228 of 25457 genes, 0.9%	8.04e-07	0	0	cd74b, cd4-1, gpr183a, kita, si:dkey-1h24.6, myd88, blk, il7r, cxcr3.2, fam49ba, lgals9l1, arpc1b, ikzf1, kitb, lgals9l3, jak3, p2ry12, igf2b, cd83, il2rga, anxa1a, skap2, cd74a
immune effector process	22 of 529 genes, 4.2%	211 of 25457 genes, 0.8%	1.02e-06	0	0	cd74b, cgas, mfap4, c1qb, c1qa, cfbl, gpr183a, rac2, irf5, myd88, tlr8b, blk, cxcr3.2, ifnphi1, tlr3, c1qc, cd83, c7b, zgc:173915, anxa1a, cd74a, ifnphi2
myeloid leukocyte migration	18 of 529 genes, 3.4%	144 of 25457 genes, 0.6%	2.01e-06	0	0	ccl34b.1, ccl34b.8, cxcl32b.1, cxcl11.5, rac2, rhogb, wasb, myd88, cxcl18b, cxcr3.2, rhoga, cxcr4b, csf1ra, lgals3b, inpp5d, anxa1a, p2rx7, cyba
positive regulation of biological process	102 of 529 genes, 19.3%	2709 of 25457 genes, 10.6%	2.93e-06	0	0	cgas, ccl34b.1, c1qa, pik3r5, cd4-1, cxcl32b.1, ano6, tnfsf10l, klhl6, rac2, si:dkey-1h24.6, cdc14ab, blk, tpx2, fybb, tlr3, myrf, notch1a, c1qc, unc93b1, igf2b, sema4aa, lpar5b, rxraa, cd74b, cdc25b, cdk2, mfap4, p2ry10, foxj2, lpar5a, scgn, gpr183a, ccnd1, si:dkey-206d17.12, trim33l, tlr8b, gpr65, ptbp1a, si:ch211-113a14.18, arhgef3l, caspb, etv4, esco2, gpr17, aplnra, sesn2, c7b, aplnrb, wasf2…
locomotion	55 of 529 genes, 10.4%	1108 of 25457 genes, 4.4%	3.85e-06	0	0	cyfip1, ccr12a, ccl34b.1, ccl34b.8, apoc1, cxcl32b.1, ano6, cxcl11.5, ptk2ba, kita, rac2, insm1a, nkx2.2a, lpxn, draxin, rhogb, wasb, myd88, cxcl18b, sema5a, plxnc1, fam83ha, ccr9a, csrp1a, sema4aa, inpp5d, itgb2, rhof, cnn2, gpr183a, cmklr1, coro1a, robo4, rgs14a, sox10, cxcr3.2, fmnl3, rhoga, fzd2, anxa5b, arhgap4a, cxcr4b, kitb, aplnra, itgb7, adam8a, csf1ra, aplnrb, mmp14b, lgals3b, p2rx7, an…
lymphocyte activation	20 of 529 genes, 3.8%	199 of 25457 genes, 0.8%	1.16e-05	0	0	cd74b, cd4-1, gpr183a, kita, si:dkey-1h24.6, blk, il7r, fam49ba, lgals9l1, arpc1b, ikzf1, kitb, lgals9l3, jak3, cd83, il2rga, igf2b, anxa1a, skap2, cd74a
positive regulation of response to stimulus	46 of 529 genes, 8.7%	871 of 25457 genes, 3.4%	1.32e-05	0	0	lgals2a, cgas, ccl34b.1, c1qb, c1qa, ccl34b.8, pik3r5, cd4-1, cxcl32b.1, tradd, kita, si:dkey-172h23.2, tnfsf10l, klhl6, si:dkey-1h24.6, myd88, gpr18, blk, il7r, bida, fybb, tlr3, c1qc, unc93b1, igf2b, traf3ip2l, lpar5b, cd74a, cd74b, rbck1, mfap4, cfbl, p2ry10, gpr183a, robo4, tlr8b, gpr65, arhgef3l, tlr21, cxcr4b, kitb, gpr17, c7b, csf1ra, zgc:173915, anxa1a
leukocyte differentiation	16 of 529 genes, 3.0%	129 of 25457 genes, 0.5%	1.87e-05	0	0	spi1b, csf1rb, gpr183a, kita, ada2b, blk, il7r, slc7a7, arpc1b, ikzf1, kitb, spi1a, jak3, il2rga, csf1ra, anxa1a
granulocyte migration	16 of 529 genes, 3.0%	129 of 25457 genes, 0.5%	1.87e-05	0	0	ccl34b.1, ccl34b.8, cxcl32b.1, cxcl11.5, rac2, rhogb, wasb, myd88, cxcl18b, rhoga, cxcr4b, csf1ra, lgals3b, inpp5d, anxa1a, cyba
macrophage chemotaxis	7 of 529 genes, 1.3%	16 of 25457 genes, 0.1%	2.46e-05	0	0	rac2, csf1ra, lgals3b, wasb, p2rx7, cyba, cxcr3.2
positive regulation of immune system process	25 of 529 genes, 4.7%	318 of 25457 genes, 1.2%	2.47e-05	0	0	cd74b, cgas, mfap4, c1qb, c1qa, cfbl, klhl6, rac2, si:dkey-1h24.6, myd88, blk, tlr8b, fam49ba, fybb, tlr3, tlr21, c1qc, unc93b1, igf2b, c7b, zgc:173915, csf1ra, adam8a, anxa1a, cd74a
T cell activation	15 of 529 genes, 2.8%	115 of 25457 genes, 0.5%	2.68e-05	0	0	cd74b, fam49ba, arpc1b, lgals9l1, cd4-1, ikzf1, gpr183a, lgals9l3, jak3, igf2b, cd83, si:dkey-1h24.6, anxa1a, il7r, cd74a
chemotaxis	31 of 529 genes, 5.9%	473 of 25457 genes, 1.9%	3.49e-05	0	0	cyfip1, ccr12a, ccl34b.1, ccl34b.8, cxcl32b.1, ano6, cxcl11.5, gpr183a, ptk2ba, rac2, cmklr1, nkx2.2a, draxin, robo4, rhogb, wasb, myd88, cxcl18b, cxcr3.2, sema5a, rhoga, plxnc1, cxcr4b, ccr9a, csf1ra, lgals3b, p2rx7, anxa1a, inpp5d, sema4aa, cyba
innate immune response	23 of 529 genes, 4.3%	282 of 25457 genes, 1.1%	4.74e-05	0	0	cgas, mfap4, ccl34b.1, ccl34b.8, cxcl32b.1, caspa, ptpn6, ptk2ba, myd88, blk, tlr8b, si:ch211-66k16.27, cxcr3.2, sla1a, tlr3, tnfaip8l2a, tlr21, caspb, unc93b1, hck, zgc:173915, csf1ra, pycard
macrophage migration	7 of 529 genes, 1.3%	18 of 25457 genes, 0.1%	6.62e-05	0	0	rac2, csf1ra, lgals3b, wasb, p2rx7, cyba, cxcr3.2
taxis	31 of 529 genes, 5.9%	490 of 25457 genes, 1.9%	7.8e-05	0	0	cyfip1, ccr12a, ccl34b.1, ccl34b.8, cxcl32b.1, ano6, cxcl11.5, gpr183a, ptk2ba, rac2, cmklr1, nkx2.2a, draxin, robo4, rhogb, wasb, myd88, cxcl18b, cxcr3.2, sema5a, rhoga, plxnc1, cxcr4b, ccr9a, csf1ra, lgals3b, p2rx7, anxa1a, inpp5d, sema4aa, cyba
regulation of cell motility	22 of 529 genes, 4.2%	273 of 25457 genes, 1.1%	0.00011	0	0	cnn2, gpr183a, ptk2ba, kita, rac2, robo4, rhogb, wasb, sema5a, rhoga, plxnc1, arhgap4a, anxa5b, fam83ha, cxcr4b, kitb, adam8a, csf1ra, anxa1a, inpp5d, sema4aa, ngfrb
regulation of cell migration	21 of 529 genes, 4.0%	254 of 25457 genes, 1.0%	0.00015	0	0	cnn2, gpr183a, ptk2ba, kita, rac2, robo4, rhogb, wasb, sema5a, rhoga, plxnc1, arhgap4a, fam83ha, cxcr4b, kitb, adam8a, csf1ra, anxa1a, inpp5d, sema4aa, ngfrb
regulation of leukocyte migration	10 of 529 genes, 1.9%	53 of 25457 genes, 0.2%	0.00019	0	0	rhoga, ptk2ba, cxcr4b, rac2, csf1ra, adam8a, wasb, rhogb, anxa1a, inpp5d
regulation of response to stimulus	72 of 529 genes, 13.6%	1829 of 25457 genes, 7.2%	0.00019	0	0	cgas, ccl34b.1, c1qa, pik3r5, cd4-1, cxcl32b.1, cyth4b, btk, cxcl11.5, ptk2ba, tnfsf10l, klhl6, rac2, si:dkey-1h24.6, blk, fybb, tlr3, c1qc, unc93b1, igf2b, inpp5d, sema4aa, lpar5b, si:ch211-246e12.3, cd74b, mfap4, p2ry10, cnn2, gpr183a, tlr8b, gpr65, ptbp1a, ifnphi1, arhgef3l, gpr17, aplnra, sesn2, si:ch1073-90m23.1, c7b, aplnrb, lgals2a, c1qb, ccl34b.8, kita, tradd, si:dkey-172h23.2, draxin, gp…
positive regulation of intracellular signal transduction	26 of 529 genes, 4.9%	384 of 25457 genes, 1.5%	0.00025	0	0	cd74b, cgas, rbck1, ccl34b.1, p2ry10, ccl34b.8, pik3r5, cd4-1, cxcl32b.1, gpr183a, tradd, kita, si:dkey-172h23.2, robo4, myd88, gpr18, gpr65, il7r, bida, arhgef3l, kitb, gpr17, traf3ip2l, igf2b, lpar5b, cd74a
granulocyte chemotaxis	13 of 529 genes, 2.5%	101 of 25457 genes, 0.4%	0.00028	0	0	ccl34b.1, ccl34b.8, cxcl32b.1, cxcl11.5, cxcr4b, rac2, csf1ra, lgals3b, wasb, myd88, anxa1a, cxcl18b, inpp5d
response to cytokine	19 of 529 genes, 3.6%	221 of 25457 genes, 0.9%	0.00033	0	0	cd74b, csf1rb, ccl34b.1, ccl34b.8, cd4-1, cxcl32b.1, cxcl11.5, kita, irf5, cxcl18b, cxcr3.2, il10ra, timp4.3, kitb, il2rga, csf1ra, anxa1a, lifrb, cd74a
neutrophil migration	14 of 529 genes, 2.6%	122 of 25457 genes, 0.5%	0.0004	0	0	rhoga, ccl34b.1, ccl34b.8, cxcl32b.1, cxcl11.5, cxcr4b, rac2, lgals3b, rhogb, wasb, myd88, cxcl18b, inpp5d, cyba
regulation of locomotion	22 of 529 genes, 4.2%	296 of 25457 genes, 1.2%	0.00047	0	0	cnn2, gpr183a, ptk2ba, kita, rac2, robo4, rhogb, wasb, sema5a, rhoga, plxnc1, arhgap4a, anxa5b, fam83ha, cxcr4b, kitb, adam8a, csf1ra, anxa1a, inpp5d, sema4aa, ngfrb
regulation of cellular component movement	22 of 529 genes, 4.2%	296 of 25457 genes, 1.2%	0.00047	0	0	cnn2, gpr183a, ptk2ba, kita, rac2, robo4, rhogb, wasb, sema5a, rhoga, plxnc1, arhgap4a, anxa5b, fam83ha, cxcr4b, kitb, adam8a, csf1ra, anxa1a, inpp5d, sema4aa, ngfrb
regulation of immune response	22 of 529 genes, 4.2%	298 of 25457 genes, 1.2%	0.00053	0	0	cd74b, cgas, mfap4, c1qb, c1qa, cfbl, kita, klhl6, si:dkey-1h24.6, myd88, blk, tlr8b, fybb, tlr3, tlr21, kitb, c1qc, unc93b1, c7b, zgc:173915, anxa1a, cd74a
intracellular signal transduction	74 of 529 genes, 14.0%	1953 of 25457 genes, 7.7%	0.00057	0	0	cgas, tuft1a, ccl34b.1, pik3r5, cd4-1, cxcl32b.1, cyth4b, btk, adcy7, rac2, dock8, sh2b3, rasgrp4, blnk, ccr9a, igf2b, prex1, csrp1a, hunk, lpar5b, prkcq, si:ch211-246e12.3, cd74b, p2ry10, cnn2, gpr183a, cmklr1, si:dkey-265e15.2, gpr65, cxcr3.2, arhgef3l, gpr17, aplnra, jak3, sesn2, si:ch1073-90m23.1, aplnrb, plcg2, si:ch211-191c10.1, pycard, ngfrb, rgl1, ccr12a, ccl34b.8, arhgap31, kita, tradd, …
gliogenesis	15 of 529 genes, 2.8%	145 of 25457 genes, 0.6%	0.0006	0	0	olig1, sox9a, slc7a7, myrf, swap70b, notch1a, gpr183a, tuba8l3, plp1b, nkx2.2a, csf1ra, sox10, anxa1a, il7r, olig2
regulation of intracellular signal transduction	36 of 529 genes, 6.8%	684 of 25457 genes, 2.7%	0.00063	0	0	cgas, ccl34b.1, ccl34b.8, pik3r5, cd4-1, cxcl32b.1, cyth4b, tradd, kita, si:dkey-172h23.2, myd88, gpr18, il7r, arhgap17b, bida, igf2b, traf3ip2l, lpar5b, cd74a, si:ch211-246e12.3, cd74b, rbck1, p2ry10, gpr183a, rgn, cnn2, robo4, gpr65, arhgef3l, ptprja, kitb, gpr17, sesn2, aplnra, si:ch1073-90m23.1, aplnrb
response to stress	68 of 529 genes, 12.9%	1743 of 25457 genes, 6.8%	0.00063	0	0	cgas, ccl34b.1, cxcl32b.1, ano6, cxcl11.5, ptk2ba, rac2, cybb, blk, si:ch211-66k16.27, ncf1, tlr3, cd59, unc93b1, p2ry12, igf2b, hck, neil3, csrp1a, cd74b, mfap4, lpar5a, f13a1b, mpeg1.1, ptpn6, ccnd1, npsn, tlr8b, cxcr3.2, ifnphi1, ninj2, f13a1a.1, im:7154036, fzd2, caspb, esco2, sesn2, si:ch73-226l13.2, il1fma, pycard, ifnphi2, ttk, lgals2a, ccl34b.8, insm1a, ppp1r15b, myd88, cxcl18b, pak2a, cd…
cytokine-mediated signaling pathway	17 of 529 genes, 3.2%	187 of 25457 genes, 0.7%	0.00065	0	0	cd74b, csf1rb, ccl34b.1, ccl34b.8, cd4-1, cxcl32b.1, cxcl11.5, kita, irf5, cxcl18b, cxcr3.2, il10ra, kitb, il2rga, csf1ra, lifrb, cd74a
regulation of developmental process	44 of 529 genes, 8.3%	942 of 25457 genes, 3.7%	0.00089	0	0	lgals2a, spi1b, cyfip1, ano6, ptk2ba, enpp1, rac2, slc3a2a, rhogb, myd88, cdca7a, f11r.1, grn2, sema5a, plxnc1, notch1a, pak2a, spi1a, igf2b, rbm47, sema4aa, cdk1, cdc25b, csf1rb, rhof, gpr183a, ccnd1, grn1, socs3a, sox10, gpr65, ptbp1a, fmnl3, rhoga, sox9a, swap70b, cxcr4b, grna, aplnra, csf1ra, aplnrb, kctd12.2, anxa1a, olig2
positive regulation of immune response	20 of 529 genes, 3.8%	259 of 25457 genes, 1.0%	0.0009	0	0	cd74b, cgas, mfap4, c1qb, c1qa, cfbl, klhl6, si:dkey-1h24.6, myd88, blk, tlr8b, fybb, tlr3, tlr21, c1qc, unc93b1, c7b, zgc:173915, anxa1a, cd74a
leukocyte activation involved in immune response	8 of 529 genes, 1.5%	36 of 25457 genes, 0.1%	0.00094	0	0	cd74b, gpr183a, cd83, blk, myd88, anxa1a, cxcr3.2, cd74a
cellular response to cytokine stimulus	17 of 529 genes, 3.2%	193 of 25457 genes, 0.8%	0.00103	0	0	cd74b, csf1rb, ccl34b.1, ccl34b.8, cd4-1, cxcl32b.1, cxcl11.5, kita, irf5, cxcl18b, cxcr3.2, il10ra, kitb, il2rga, csf1ra, lifrb, cd74a
positive regulation of cytosolic calcium ion concentration	16 of 529 genes, 3.0%	176 of 25457 genes, 0.7%	0.00144	0	0	itpr2, ccr12a, p2ry10, cmklr1, gpr18, gpr65, cxcr3.2, ptbp1a, cxcr4b, ccr9a, gpr17, aplnra, aplnrb, itpr3, p2rx7, lpar5b
cell activation involved in immune response	8 of 529 genes, 1.5%	38 of 25457 genes, 0.1%	0.00147	0	0	cd74b, gpr183a, cd83, blk, myd88, anxa1a, cxcr3.2, cd74a
response to external stimulus	50 of 529 genes, 9.5%	1161 of 25457 genes, 4.6%	0.00162	0	0	cgas, cyfip1, ccr12a, ccl34b.1, ccl34b.8, cxcl32b.1, ano6, cxcl11.5, ptk2ba, atf3, rac2, nkx2.2a, draxin, rhogb, wasb, myd88, blk, cxcl18b, ncf1, sema5a, plxnc1, tlr3, cd59, ccr9a, inpp5d, sema4aa, cfbl, gpr183a, mpeg1.1, npsn, cmklr1, socs3a, irf5, robo4, tlr8b, cxcr3.2, ctsk, ifnphi1, rhoga, tlr21, caspb, cxcr4b, sesn2, csf1ra, lgals3b, pycard, p2rx7, anxa1a, ifnphi2, cyba
inflammatory response	19 of 529 genes, 3.6%	246 of 25457 genes, 1.0%	0.00172	0	0	ccl34b.1, ccl34b.8, cxcl32b.1, cxcl11.5, myd88, tlr8b, si:ch211-66k16.27, cxcl18b, tlr3, tlr21, caspb, cxcr4b, p2ry12, si:ch73-226l13.2, adam8a, csf1ra, il1fma, pycard, anxa1a
oligodendrocyte differentiation	9 of 529 genes, 1.7%	52 of 25457 genes, 0.2%	0.00177	0	0	olig1, sox9a, myrf, swap70b, plp1b, nkx2.2a, sox10, olig2, il7r
regulation of cytosolic calcium ion concentration	17 of 529 genes, 3.2%	207 of 25457 genes, 0.8%	0.00273	0	0	itpr2, ccr12a, p2ry10, scgn, cmklr1, gpr18, gpr65, cxcr3.2, ptbp1a, cxcr4b, ccr9a, gpr17, aplnra, aplnrb, itpr3, p2rx7, lpar5b
hemopoiesis	29 of 529 genes, 5.5%	520 of 25457 genes, 2.0%	0.00279	0	0	spi1b, ephx2, csf1rb, scube1, gpr183a, kita, ada2b, myd88, hlx1, blk, gpr65, cdca7a, il7r, sh2b3, f11r.1, rgs18, slc7a7, arpc1b, notch1a, ikzf1, kitb, jak3, spi1a, il2rga, csf1ra, bdh2, anxa1a, dok2, itgb2
regulation of multicellular organismal process	47 of 529 genes, 8.9%	1090 of 25457 genes, 4.3%	0.00336	0	0	lgals2a, spi1b, cgas, apoc1, ano6, ptk2ba, enpp1, myd88, blk, cdca7a, grn2, f11r.1, sema5a, plxnc1, tlr3, notch1a, pak2a, spi1a, sema4aa, cd74a, cdk1, cd74b, cdc25b, csf1rb, gpr183a, cnn2, ccnd1, grn1, socs3a, sox10, tlr8b, gpr65, sox9a, lgals9l1, anxa5b, swap70b, cxcr4b, grna, lgals9l3, aplnra, csf1ra, aplnrb, eif4ebp3l, apoeb, kctd12.2, anxa1a, olig2
Rac protein signal transduction	6 of 529 genes, 1.1%	20 of 25457 genes, 0.1%	0.00373	0	0	arhgap17b, rac2, rhoga, robo4, rhogb, si:ch211-246e12.3
hematopoietic or lymphoid organ development	29 of 529 genes, 5.5%	532 of 25457 genes, 2.1%	0.00438	0	0	spi1b, ephx2, csf1rb, scube1, gpr183a, kita, ada2b, myd88, hlx1, blk, gpr65, cdca7a, il7r, sh2b3, f11r.1, rgs18, slc7a7, arpc1b, notch1a, ikzf1, kitb, jak3, spi1a, il2rga, csf1ra, bdh2, anxa1a, dok2, itgb2
glial cell differentiation	13 of 529 genes, 2.5%	131 of 25457 genes, 0.5%	0.00572	0	0	olig1, sox9a, slc7a7, myrf, swap70b, notch1a, tuba8l3, plp1b, nkx2.2a, csf1ra, sox10, il7r, olig2
small GTPase mediated signal transduction	22 of 529 genes, 4.2%	344 of 25457 genes, 1.4%	0.00581	0	0	rhof, p2ry10, cyth4b, arhgap31, si:dkey-172h23.2, rac2, robo4, rhogb, dock8, gpr18, gpr65, arhgap17b, rhoga, rasgrp4, arhgef3l, gpr17, si:ch1073-90m23.1, myo9b, lpar5b, ngfrb, rgl1, si:ch211-246e12.3
neutrophil chemotaxis	11 of 529 genes, 2.1%	94 of 25457 genes, 0.4%	0.00647	0	0	ccl34b.1, ccl34b.8, cxcl32b.1, cxcl11.5, cxcr4b, rac2, lgals3b, wasb, myd88, cxcl18b, inpp5d
immune system development	29 of 529 genes, 5.5%	543 of 25457 genes, 2.1%	0.00652	0	0	spi1b, ephx2, csf1rb, scube1, gpr183a, kita, ada2b, myd88, hlx1, blk, gpr65, cdca7a, il7r, sh2b3, f11r.1, rgs18, slc7a7, arpc1b, notch1a, ikzf1, kitb, jak3, spi1a, il2rga, csf1ra, bdh2, anxa1a, dok2, itgb2
regulation of neutrophil migration	6 of 529 genes, 1.1%	22 of 25457 genes, 0.1%	0.00694	0	0	rac2, rhoga, rhogb, wasb, cxcr4b, inpp5d
positive regulation of cellular process	80 of 529 genes, 15.1%	2322 of 25457 genes, 9.1%	0.00751	0	0	cgas, ccl34b.1, pik3r5, cd4-1, cxcl32b.1, tnfsf10l, rac2, cdc14ab, blk, tpx2, myrf, notch1a, igf2b, sema4aa, lpar5b, rxraa, cd74b, cdc25b, cdk2, p2ry10, foxj2, scgn, gpr183a, ccnd1, si:dkey-206d17.12, trim33l, gpr65, ptbp1a, si:ch211-113a14.18, arhgef3l, caspb, etv4, esco2, gpr17, aplnra, sesn2, aplnrb, wasf2, pycard, olig2, lgals2a, bnip4, ccl34b.8, tradd, kita, si:dkey-172h23.2, nkx2.2a, wasb, …
